# Supplementary material
Source: PubMed Central journal article supplement (PMC7369500)
Supplement: AET2-4-212-s001.pdf [file AET2-4-212-s001.pdf]

# Attending Survey

Please complete the survey below.

Thank you!

---

**Patient Information**

---

Attending

---

Resident

---

MRN

---

Patient Chief Complaint

---

Was POCUS indicated?

- Yes - in my clinical practice POCUS is likely to add critical information that will change clinical management or disposition
- No - in my clinical practice POCUS is unlikely to add critical information that will change clinical management or disposition
- Maybe - in my clinical practice POCUS could add critical information that will change management or disposition

Why?

---

**Attending Survey**

Which application(s)?

- Cardiac
- Lung
- IVC
- Aorta
- Abdominal Fluid
- Gallbladder
- DVT
- Soft Tissue
- MSK
- Pelvic
- Other

Other:  

---

At the time of patient discussion, did the PGY-4 think POCUS was indicated?

- Yes, without prompting
- Yes, but needed prompting
- No

Was timely\* POCUS performed? (\*timely defined as done within a time frame able to effect critical management or dispo decisions)

- Yes
- Yes - but not by the PGY-4
- No

Did the PGY-4 correctly interpret the findings?

- Yes
- No
- PGY-4 did not review scans
- Required some prompting

Did the PGY-4 incorporate the findings into patient care?

- Yes
- No
- Required some prompting

Did the PGY-4 correctly incorporate findings into patient care?

- Yes
- No
- Required some prompting

Why not?

- Lack of required views
- Poor image quality
- Incorrect image interpretation
- Lack of understanding of clinical application
- Unsure
- Other

Other:  

---

Is this PGY-4 competent to use POCUS to diagnose and manage critically ill patients in the Emergency Department?

- Not entrustable, cannot perform without complete assistance
- Pre-entrustable, requires some assistance
- Entrustable, can perform independently
